# Supplementary material for: Sigma-1 Receptor Modulation by Ligands Coordinates Cancer Cell Energy Metabolism
Source: MDPI journal article supplement (doi:10.3390/biom12060762), 2022-05-30
Supplement: s1 [file s1]

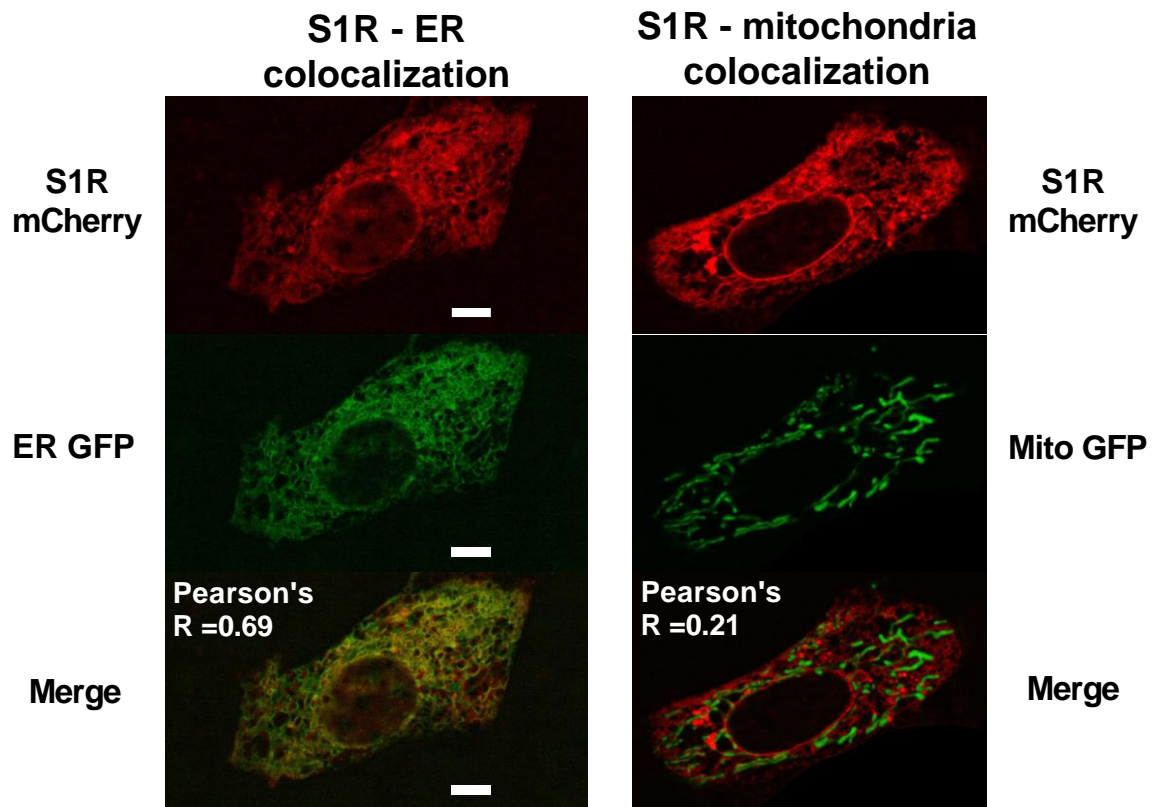

**Figure S1.** S1R overexpression in MCF7 cells. Overexpressed S1R-mCherry construct has a clear ER localization and colocalizes with ER-targeted GFP construct that has calreticulin targeting and ER retention sequences, and not with mitochondria targeted GFP construct.

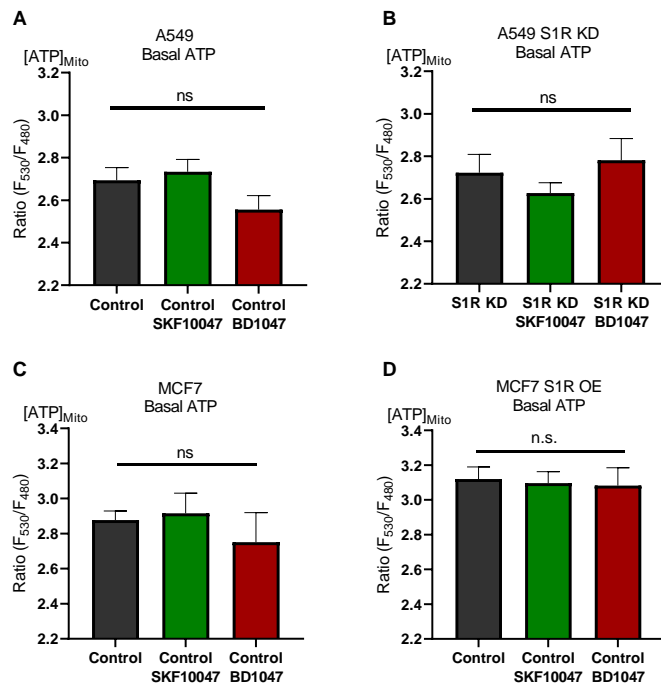

**Figure S2.** Effect of S1R and its ligands on mitochondrial basal ATP levels. (A) Bar graph represents the basal mitochondrial ATP levels measured with

mtAT.1.03 for control (black), Control+SKF10047 (green), Control + BD1047 (red), (B) S1R KD (black), S1R KD +SKF10047 (green) and S1R KD +BD1047 (red) in A549 cells. (C) Bar graph represents the basal mitochondrial ATP levels for control (black), Control+SKF10047 (green) and Control + BD1047 (red) in MCF7 cells. (D) Bar graph represents the basal mitochondrial ATP levels for control (black), Control+SKF10047 (green) and Control + BD1047 (red) in MCF7 cells with S1R OE. Cells were treated with BD1047 and SKF10047 2-4 h prior to each experiment. Significant differences were assessed using one-way ANOVA with Tukey's multiple comparison test and presented as (ns: not significant). A549 cells: Control (32 cells/ 12 experiments), Control + SKF10047 (29 cells/ 16 experiments), Control + BD1047 (22 cells/ 15 experiments), SR1 KD (16 cells/ 13 experiments), S1R KD + SKF10047 (15 cells/ 10 experiments) and S1RKD + BD1047 (13 cells/ 8 experiments). MCF7 cells: Control (15 cells/ 6 experiments), Control + SKF10047 (13 cells/ 4 experiments) and Control + BD1047 (11 cells/ 5 experiments). MCF7 cells with S1R OE: Control (23 cells/ 7 experiments), Control + SKF10047 (26 cells/ 8 experiments) and Control + BD1047 (18 cells/ 5 experiments).

### A549

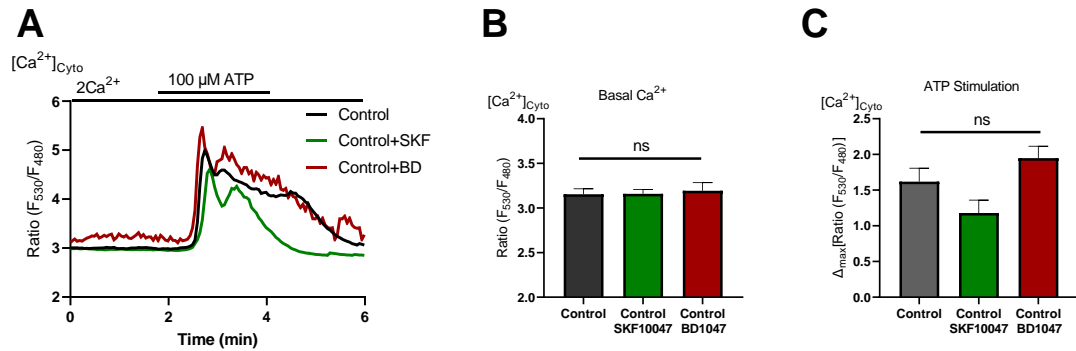

### A549 S1R KD

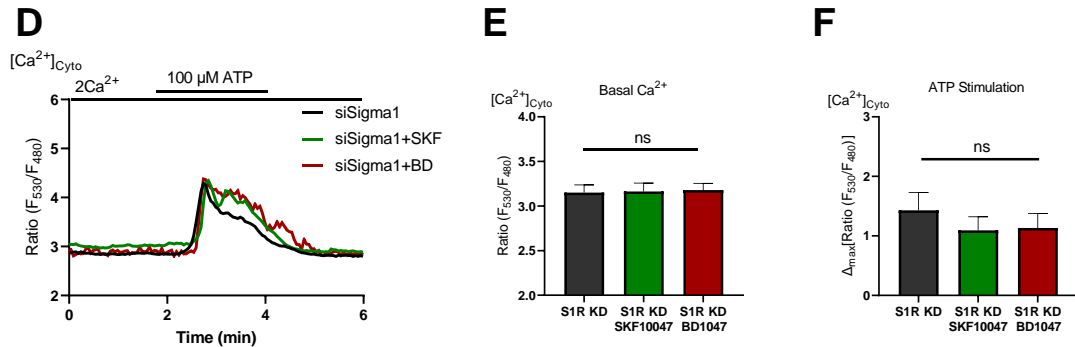

### MCF7

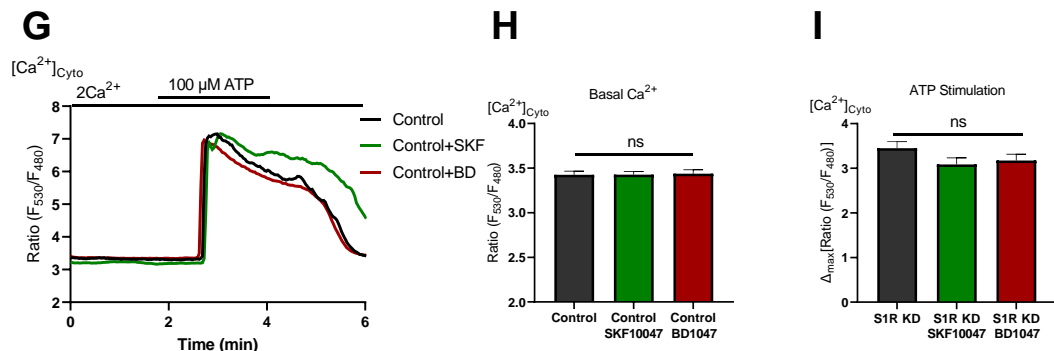

**Figure S3.** Effect of pharmacological activation of S1R on cytosolic  $\text{Ca}^{2+}$  homeostasis. (A) Representative traces of cytosolic  $\text{Ca}^{2+}$  levels measured with D3cpv for control (black), Control+SKF10047 (green) and Control + BD1047 (red) in A549 cells. (B) Bar graphs represents basal cytosolic  $\text{Ca}^{2+}$  level as MEAN $\pm$ SEM for Control (black), Control+SKF10047 (green) and Control+BD1047 (red) in A549 cells. (C) Bar graphs represents ATP (100  $\mu\text{M}$ ) induced cytosolic  $\text{Ca}^{2+}$  uptake as MEAN $\pm$ SEM for Control (black), Control+SKF10047 (green) and Control+BD1047 (red) in A549 cells. (D) Representative traces of cytosolic  $\text{Ca}^{2+}$  levels for S1R KD (black), S1R KD +SKF10047 (green) and S1R KD +BD1047 (red) in A549 cells. (E) Bar graphs represents basal cytosolic  $\text{Ca}^{2+}$  level as MEAN $\pm$ SEM for S1R KD (black), S1R KD +SKF10047 (green) and S1R KD +BD1047 (red) in A549 cells. (F) Bar graphs represents ATP (100  $\mu\text{M}$ ) induced cytosolic  $\text{Ca}^{2+}$  uptake as MEAN $\pm$ SEM for S1R KD (black), S1R KD +SKF10047 (green) and S1R KD +BD1047 (red) in A549 cells. (G) Representative traces of cytosolic  $\text{Ca}^{2+}$  levels for Control (black), Control+SKF10047 (green) and Control+BD1047 (red) in MCF7 cells. (H) Bar graphs represents basal cytosolic  $\text{Ca}^{2+}$  level as MEAN $\pm$ SEM for Control (black), Control+SKF10047 (green) and Control+BD1047 (red) in MCF7 cells. (I) Bar graphs represents ATP (100  $\mu\text{M}$ ) induced cytosolic  $\text{Ca}^{2+}$  uptake as MEAN $\pm$ SEM for Control (black), Control+SKF10047 (green) and Control+BD1047 (red) in MCF7 cells. Cells were treated with BD1047 and SKF10047 2-4 h prior to each experiment. Significant differences were assessed using one-way ANOVA with Tukey's multiple comparison test and presented as (ns: not significant). A549 cells basal  $\text{Ca}^{2+}$  measurements: Control (30 cells/ 6 experiments), Control + SKF10047 (33 cells/ 7 experiments), Control + BD1047 (36 cells/ 6 experiments), S1R KD (27 cells/ 7 experiments), S1R KD + SKF10047 (29 cells/ 8 experiments) and S1R KD + BD1047 (27 cells/ 7 experiments). A549 cells ATP stimulation: Control (14 cells/ 6 experiments), Control + SKF10047 (13 cells/ 7 experiments), Control + BD1047 (21 cells/ 6 experiments), S1R KD (14 cells/ 7 experiments), S1R KD + SKF10047 (15 cells/ 8 experiments) and S1R KD + BD1047 (12 cells/ 7 experiments). MCF7 cells basal  $\text{Ca}^{2+}$  measurements: Control (33 cells/ 3 experiments), Control + SKF10047 (44 cells/ 4 experiments) and Control + BD1047 (45 cells/ 3 experiments). MCF7 cells ATP stimulation: Control (14 cells/ 3 experiments), Control + SKF10047 (17 cells/ 4 experiments) and Control + BD1047 (18 cells/ 3 experiments).
